# Supplementary material for: Prioritizing Zoonoses: A Proposed One Health Tool for Collaborative Decision-Making
Source: PLoS One. 2014 Oct 10;9(10):e109986. doi: 10.1371/journal.pone.0109986 (PMC4193859; doi:10.1371/journal.pone.0109986)
Supplement: Table S3 — Step 4: Excel program for group ranking of criteria using the Analytic Hierarchy Process. (XLSX) [file pone.0109986.s003.xlsx]

## Sheet: Sheet1
Table S3. Step 4: Excel program for group ranking of criteria using the Analytic Hierarchy Process.
Criteria			Abbreviation
Morbidity and Mortality			M/M
Food security			FS
Ability to Prevent/Control			Control
Amenability to Collaborate			Collab
Bioterrorism			BioT
Number of participants (N)=		6
Number of criteria		5
Participant 1
	M/M	FS	Control	Collab	BioT		Approx Method	Ranking	Consistency Ratio (CR) - Step 1	CR - Step 2	CR -Step 3	CR		A Consistency Ratio < 0.1 is acceptable
M/M	1	3	1	4	3		0.346377	1	1.86081	5.3722	0.0869075	0.077596
FS	0.333333	1	1	1	2		0.167696	3	0.896934	5.34858
Control	1	1	1	3	3		0.268172	2	1.43551	5.35295
Collab	0.25	1	0.333333	1	0.333333		0.0899034	5	0.476201	5.29681
BioT	0.333333	0.5	0.333333	3	1		0.127852	4	0.68626	5.36761
										5.34763
Participant 2
	M/M	FS	Control	Collab	BioT		Approx Method	Ranking	Consistency Ratio (CR) - Step 1	CR - Step 2	CR -Step 3	CR
M/M	1	3	2	2	4		0.364251	1	1.88033	5.16219	0.0236829	0.0211454
FS	0.333333	1	0.5	0.333333	2		0.1089	4	0.549408	5.04508
Control	0.5	2	1	0.5	3		0.182448	3	0.924174	5.06542
Collab	0.5	3	2	1	4		0.276561	2	1.42164	5.14042
BioT	0.25	0.5	0.333333	0.25	1		0.0678403	5	0.343309	5.06055
										5.09473
Participant 3
	M/M	FS	Control	Collab	BioT		Approx Method	Ranking	Consistency Ratio (CR) - Step 1	CR - Step 2	CR -Step 3	CR
M/M	1	8	9	5	2		0.450046	1	2.51223	5.58217	0.110586	0.0987371
FS	0.125	1	2	0.2	0.2		0.054344	4	0.27428	5.04711
Control	0.111111	0.5	1	0.25	0.125		0.0358658	5	0.186559	5.20158
Collab	0.2	5	4	1	0.142857		0.128384	3	0.680914	5.30372
BioT	0.5	5	8	7	1		0.33136	2	2.01372	6.07713
										5.44234
Participant 4
	M/M	FS	Control	Collab	BioT		Approx Method	Ranking	Consistency Ratio (CR) - Step 1	CR - Step 2	CR -Step 3	CR
M/M	1	0.333333	0.111111	1	3		0.081168	4	0.419718	5.17098	0.0444143	0.0396556
FS	3	1	0.333333	5	8		0.265171	2	1.38669	5.22942
Control	9	3	1	6	9		0.535512	1	2.8792	5.37653
Collab	1	0.2	0.166667	1	3		0.0818951	3	0.414113	5.05662
BioT	0.333333	0.125	0.111111	0.333333	1		0.0362544	5	0.183256	5.05473
										5.17766
Participant 5
	M/M	FS	Control	Collab	BioT		Approx Method	Ranking	Consistency Ratio (CR) - Step 1	CR - Step 2	CR -Step 3	CR
M/M	1	5	3	7	9		0.50907	1	2.73481	5.37217	0.0460244	0.0410932
FS	0.2	1	0.333333	3	5		0.137841	3	0.700504	5.08196
Control	0.333333	3	1	4	7		0.252501	2	1.35044	5.34827
Collab	0.142857	0.333333	0.25	1	2		0.063128	4	0.319844	5.06659
BioT	0.111111	0.2	0.142857	0.5	1		0.0374595	5	0.189227	5.0515
										5.1841
Participant 6
	M/M	FS	Control	Collab	BioT		Approx Method	Ranking	Consistency Ratio (CR) - Step 1	CR - Step 2	CR -Step 3	CR
M/M	1	4	0.333333	8	6		0.289136	2	1.62698	5.62705	0.0812933	0.0725833
FS	0.25	1	0.2	5	4		0.137265	3	0.712397	5.18992
Control	3	5	1	8	7		0.481184	1	2.71877	5.65018
Collab	0.125	0.2	0.125	1	0.5		0.0369508	5	0.188426	5.09937
BioT	0.166667	0.25	0.142857	2	1		0.0554641	4	0.280612	5.05934
										5.32517
COMBINED MATRIX- Final Ranking
	M/M	FS	Control	Collab	BioT
M/M	1	1.69043	1.57808	1.73205	1.73205
FS	1.2723	1	1.27847	1.56217	1.66363
Control	1.55143	1.56157	1	1.67074	1.75406
Collab	1.14197	1.4612	1.37894	1	1.46722
BioT	1.09187	1.36872	1.44394	1.53504	1
	6.05758	7.08192	6.67943	7.5	7.61695
							FINAL
	M/M	FS	Control	Collab	BioT	APROX_MET	RANKING_AM		Approximation method is used to generate the final score*
M/M	0.165082	0.238696	0.236259	0.23094	0.227394	0.219674	1
FS	0.210034	0.141205	0.191404	0.208289	0.218411	0.193869	3
Control	0.256115	0.220501	0.149713	0.222766	0.230284	0.215876	2
Collab	0.18852	0.206328	0.206446	0.133333	0.192625	0.18545	4
BioT	0.180249	0.19327	0.216177	0.204672	0.131286	0.185131	5
*Saaty TL. Decision Making For Leader. 2012. Third Edition. RWS Publications.
